# Supplementary material for: Preoperative Neutrophil to Lymphocyte Ratio and Platelet to Lymphocyte Ratio are Associated with the Prognosis of Group 3 and Group 4 Medulloblastoma
Source: PubMed Central journal article supplement (PMC6744413; doi:10.1038/s41598-019-49733-6), 2019-09-13
Supplement: 41598_2019_49733_MOESM1_ESM.pdf [file 41598_2019_49733_MOESM1_ESM.pdf]

**Preoperative Neutrophil to Lymphocyte Ratio and Platelet to Lymphocyte Ratio are associated with the prognosis of Group 3 and Group 4 medulloblastoma**

Ke Li<sup>1\*</sup>, Wen-chao Duan<sup>1\*</sup>, Hai-biao Zhao<sup>1\*</sup>, Li Wang<sup>2</sup>, Wei-wei Wang<sup>2</sup>, Yun-bo Zhan<sup>1</sup>, Tao Sun<sup>1</sup>, Feng-jiang Zhang<sup>1</sup>, Bin Yu<sup>1</sup>, Ya-hui Bai<sup>1</sup>, Yan-min Wang<sup>1</sup>, Yu-chen Ji<sup>1</sup>, Jin-qiao Zhou<sup>1</sup>, Xian-zhi Liu<sup>1</sup>, Zhi-feng Zhang<sup>1</sup>, Zhen-yu Zhang<sup>1</sup>

<sup>1</sup>Department of Neurosurgery, The First Affiliated Hospital of Zhengzhou University, Zhengzhou, Henan, China, 450052

<sup>2</sup>Department of Pathology, The First Affiliated Hospital of Zhengzhou University, Zhengzhou, Henan, China, 450052

**Corresponding Authors:**

Zhen-yu Zhang, M.D. Department of Neurosurgery, First Affiliated Hospital of Zhengzhou University, Jian she Dong Road 1, Zhengzhou, Henan, China, 450052.  
E-mail: [neurozzy@foxmail.com](mailto:neurozzy@foxmail.com).

Zhi-feng Zhang, M.D. Department of Neurosurgery, First Affiliated Hospital of Zhengzhou University, Jian she Dong Road 1, Zhengzhou, Henan, China, 450052.  
E-mail: [zzfh72@sina.com](mailto:zzfh72@sina.com).

**Supplementary Table 1.** Preoperative hematological markers are compared with four molecular subgroups by One-way ANOVA. (n = 144).

| Parameters          | $\bar{x} \pm s$                    | <i>P</i> -value |
|---------------------|------------------------------------|-----------------|
| <b>NLR</b>          |                                    |                 |
| WNT vs. SHH         | 1.56 ± 0.84 vs. 2.19 ± 1.81        | 0.529           |
| WNT vs. Group 3     | 1.56 ± 0.84 vs. 4.02 ± 3.77        | <b>0.007</b>    |
| WNT vs. Group 4     | 1.56 ± 0.84 vs. 3.31 ± 5.50        | 0.070           |
| SHH vs. Group 3     | 2.19 ± 1.81 vs. 4.02 ± 3.77        | <b>0.034</b>    |
| SHH vs. Group 4     | 2.19 ± 1.81 vs. 3.31 ± 5.50        | 0.223           |
| Group 3 vs. Group 4 | 4.02 ± 3.77 vs. 3.31 ± 5.50        | 0.370           |
| <b>PLR</b>          |                                    |                 |
| WNT vs. SHH         | 110.46 ± 51.28 vs. 130.28 ± 74.98  | 0.435           |
| WNT vs. Group 3     | 110.46 ± 51.28 vs. 163.66 ± 74.47  | <b>0.021</b>    |
| WNT vs. Group 4     | 110.46 ± 51.28 vs. 167.85 ± 138.77 | <b>0.018</b>    |
| SHH vs. Group 3     | 130.28 ± 74.98 vs. 163.66 ± 74.47  | 0.123           |
| SHH vs. Group 4     | 130.28 ± 74.98 vs. 167.85 ± 138.77 | 0.102           |
| Group 3 vs. Group 4 | 163.66 ± 74.47 vs. 167.85 ± 138.77 | 0.835           |
| MLR                 | 0.27 ± 0.45                        | 0.544           |
| MPV                 | 8.55 ± 1.42                        | 0.580           |
| PDW                 | 15.68 ± 1.42                       | 0.120           |
| AGR                 | 1.93 ± 0.44                        | 0.675           |

**Supplementary Table 2.** Multivariate analysis of prognostic parameters for PFS and OS in medulloblastoma patients (n = 116).

| Parameters          | PFS                  |                 | OS                   |                  |
|---------------------|----------------------|-----------------|----------------------|------------------|
|                     | OR (95% CI)          | <i>P</i> -value | OR (95% CI)          | <i>P</i> -value  |
| Age                 |                      |                 |                      |                  |
| Adults              | Reference            |                 | Reference            |                  |
| Children            | 1.434 (0.513-4.011)  | 0.492           | 1.398 (0.393-4.974)  | 0.605            |
| Extent of resection |                      |                 |                      |                  |
| Gross Total         | Reference            |                 | Reference            |                  |
| Subtotal            | 1.900 (0.944-3.824)  | 0.072           | 2.543 (1.049-6.166)  | <b>0.039</b>     |
| RT                  |                      |                 |                      |                  |
| Yes                 | Reference            |                 | Reference            |                  |
| No                  | 2.930 (1.486-5.777)  | <b>0.002</b>    | 4.333 (2.025-9.274)  | <b>&lt;0.001</b> |
| Location            |                      |                 |                      |                  |
| Midline             | Reference            |                 | Reference            |                  |
| Lateral             | 0.735 (0.318-1.699)  | 0.471           | 0.726 (0.280-1.833)  | 0.511            |
| Molecular subgroups |                      |                 |                      |                  |
| WNT                 | Reference            |                 | Reference            |                  |
| SHH                 | 1.478 (0.398-5.487)  | 0.559           | 2.338 (0.483-11.312) | 0.291            |
| Group 3             | 3.893 (1.440-10.527) | <b>0.007</b>    | 4.827 (1.383-16.849) | <b>0.014</b>     |
| Group 4             | 3.355 (1.104-10.196) | <b>0.033</b>    | 3.441 (0.859-13.781) | 0.081            |
| NLR                 | 1.039 (0.994-1.085)  | 0.090           | 1.059 (1.012-1.108)  | <b>0.013</b>     |

**Supplementary Table 3.** Multivariate analysis of prognostic parameters for PFS and OS in medulloblastoma patients (n = 116).

| Parameters          | PFS                  |                 | OS                   |                  |
|---------------------|----------------------|-----------------|----------------------|------------------|
|                     | OR (95% CI)          | <i>P</i> -value | OR (95% CI)          | <i>P</i> -value  |
| Age                 |                      |                 |                      |                  |
| Adults              | Reference            |                 | Reference            |                  |
| Children            | 1.561 (0.555-4.389)  | 0.399           | 1.595 (0.442-5.756)  | 0.476            |
| Extent of resection |                      |                 |                      |                  |
| Gross Total         | Reference            |                 | Reference            |                  |
| Subtotal            | 1.892 (0.942-3.800)  | 0.073           | 2.520 (1.043-6.089)  | <b>0.040</b>     |
| RT                  |                      |                 |                      |                  |
| Yes                 | Reference            |                 | Reference            |                  |
| No                  | 2.988 (1.510-5.913)  | <b>0.002</b>    | 4.537 (2.105-9.778)  | <b>&lt;0.001</b> |
| Location            |                      |                 |                      |                  |
| Midline             | Reference            |                 | Reference            |                  |
| Lateral             | 0.682 (0.294-1.582)  | 0.372           | 0.638 (0.244-1.665)  | 0.358            |
| Molecular subgroups |                      |                 |                      |                  |
| WNT                 | Reference            |                 | Reference            |                  |
| SHH                 | 1.522 (0.408-5.683)  | 0.532           | 2.491 (0.509-12.199) | 0.260            |
| Group 3             | 4.056 (1.500-10.967) | <b>0.006</b>    | 5.182 (1.480-18.142) | <b>0.010</b>     |
| Group 4             | 3.518 (1.170-10.581) | <b>0.025</b>    | 3.672 (0.929-14.516) | 0.064            |
| PLR                 | 1.002 (0.994-1.004)  | 0.107           | 1.003 (1.001-1.005)  | <b>0.014</b>     |

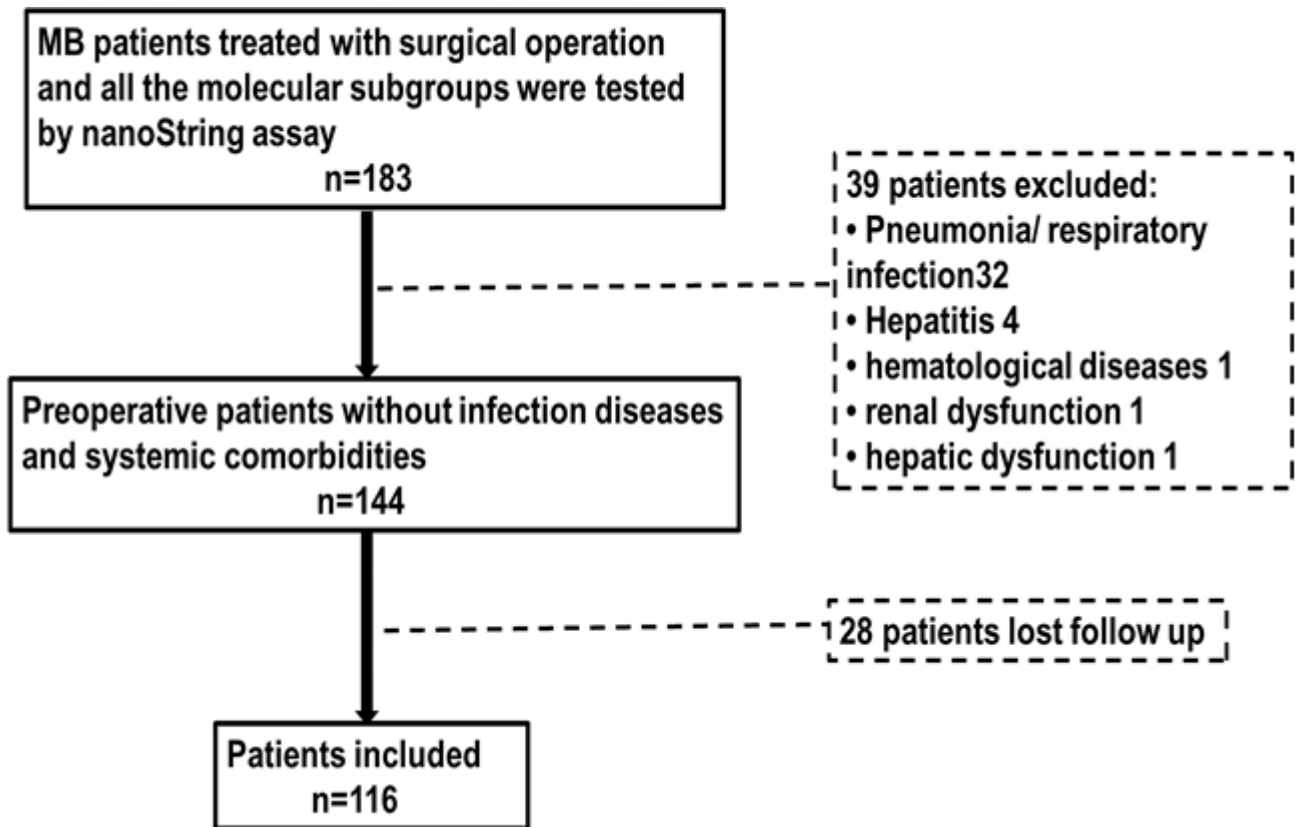

Supplementary Figure 1: Flowchart of patient selection.
